# Supplementary material
Source: Copernicus journal article supplement (doi:10.5194/egusphere-2026-2303)
Supplement: Supplementary file 1 [file egusphere-2026-2303-supplement.pdf]

Table S1 Distribution coefficients of photosynthetic products to leaves (PL<sub>o</sub>) and roots (PR<sub>o</sub>), and the ratio of yellow to green leaves (YGR<sub>o</sub>) in the Agro-C model

| DVI | Maize           |                 |                  | Wheat           |                 |                  |
|-----|-----------------|-----------------|------------------|-----------------|-----------------|------------------|
|     | PL <sub>o</sub> | PR <sub>o</sub> | YGR <sub>o</sub> | PL <sub>o</sub> | PR <sub>o</sub> | YGR <sub>o</sub> |
| 0   | 0.45            | 0.3             | 0                | 0.425           | 0.3             | 0                |
| 0.1 | 0.45            | 0.3             | 0                | 0.425           | 0.3             | 0                |
| 0.2 | 0.4             | 0.3             | 0                | 0.425           | 0.3             | 0                |
| 0.3 | 0.4             | 0.3             | 0                | 0.425           | 0.3             | 0                |
| 0.4 | 0.3             | 0.3             | 0                | 0.425           | 0.3             | 0                |
| 0.5 | 0.3             | 0.2             | 0                | 0.425           | 0.25            | 0                |
| 0.6 | 0.25            | 0.13            | 0.027            | 0.34            | 0.19            | 0.319            |
| 0.7 | 0.2             | 0.06            | 0.037            | 0.255           | 0.13            | 0.349            |
| 0.8 | 0.1             | 0               | 0.048            | 0.17            | 0.1             | 0.378            |
| 0.9 | 0               | 0               | 0.061            | 0.085           | 0.05            | 0.408            |
| 1   | 0               | 0               | 0.076            | 0               | 0               | 0.438            |
| 1.1 | 0               | 0               | 0.148            | 0               | 0               | 1.276            |
| 1.2 | 0               | 0               | 0.221            | 0               | 0               | 2.134            |
| 1.3 | 0               | 0               | 0.293            | 0               | 0               | 2.993            |
| 1.4 | 0               | 0               | 0.366            | 0               | 0               | 3.851            |
| 1.5 | 0               | 0               | 0.438            | 0               | 0               | 4.709            |
| 1.6 | 0               | 0               | 0.51             | 0               | 0               | 5.567            |
| 1.7 | 0               | 0               | 0.583            | 0               | 0               | 6.425            |
| 1.8 | 0               | 0               | 0.655            | 0               | 0               | 7.284            |
| 1.9 | 0               | 0               | 0.728            | 0               | 0               | 8.142            |
| 2   | 0               | 0               | 0.8              | 0               | 0               | 9                |

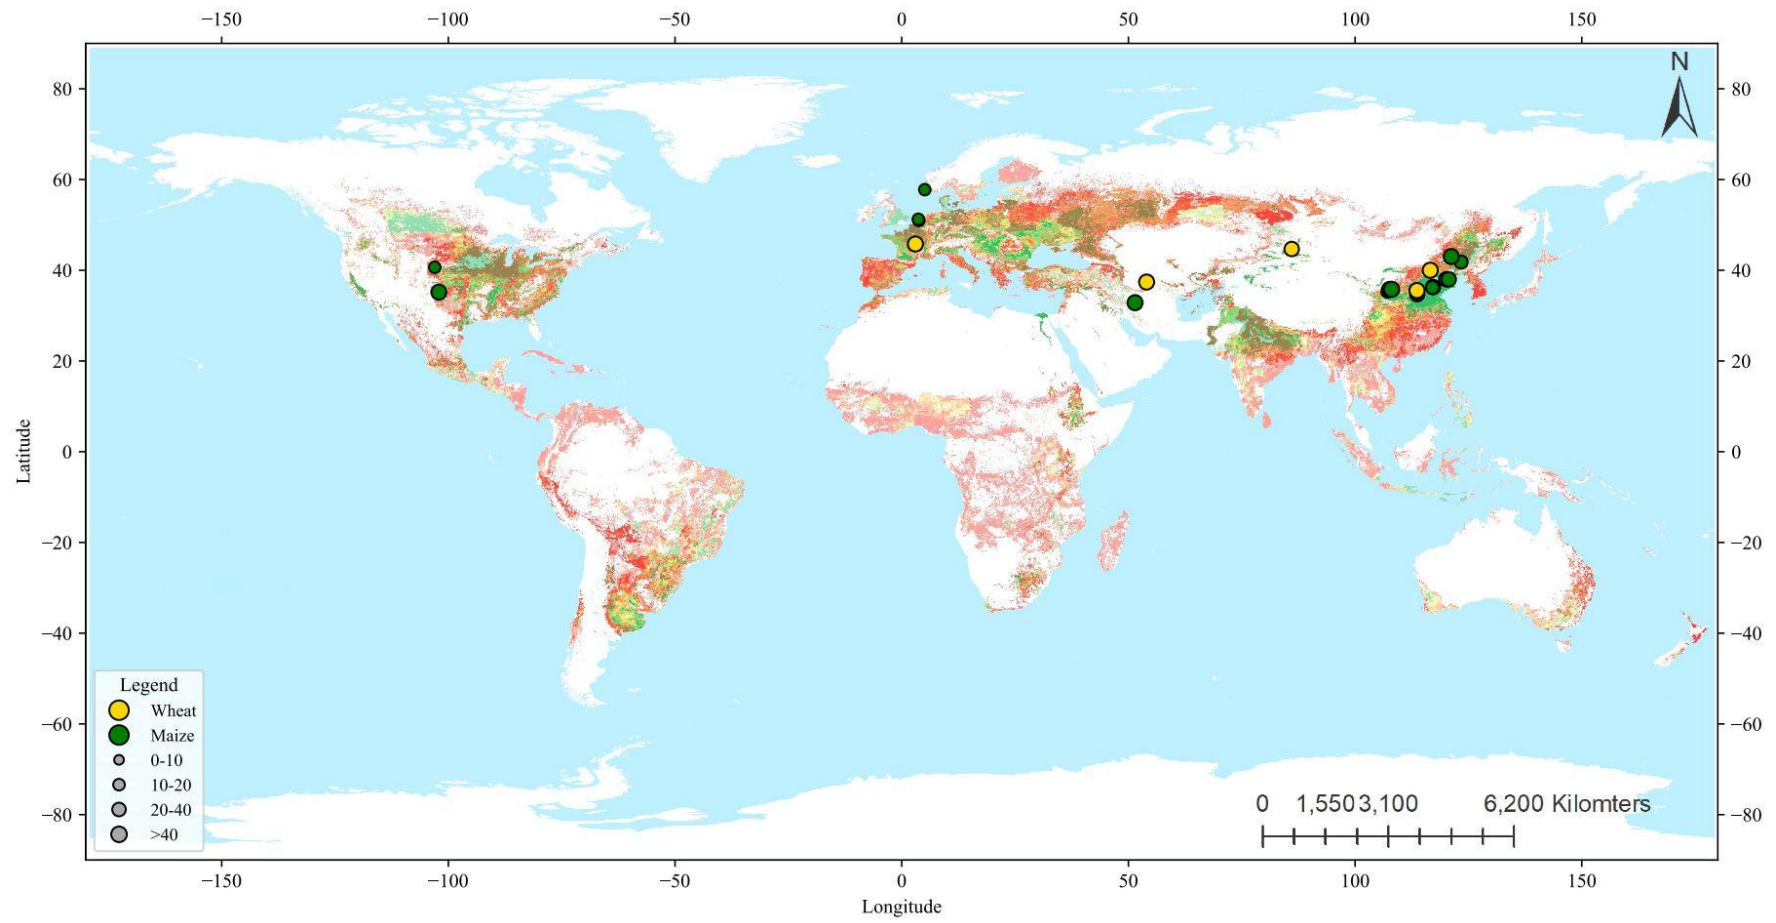

Fig. S1 Distribution of the observation sites for maize and wheat crops. The size of the circle represents the amount of data obtained at each site. Wheat and maize division map from Qin et al. (2023).

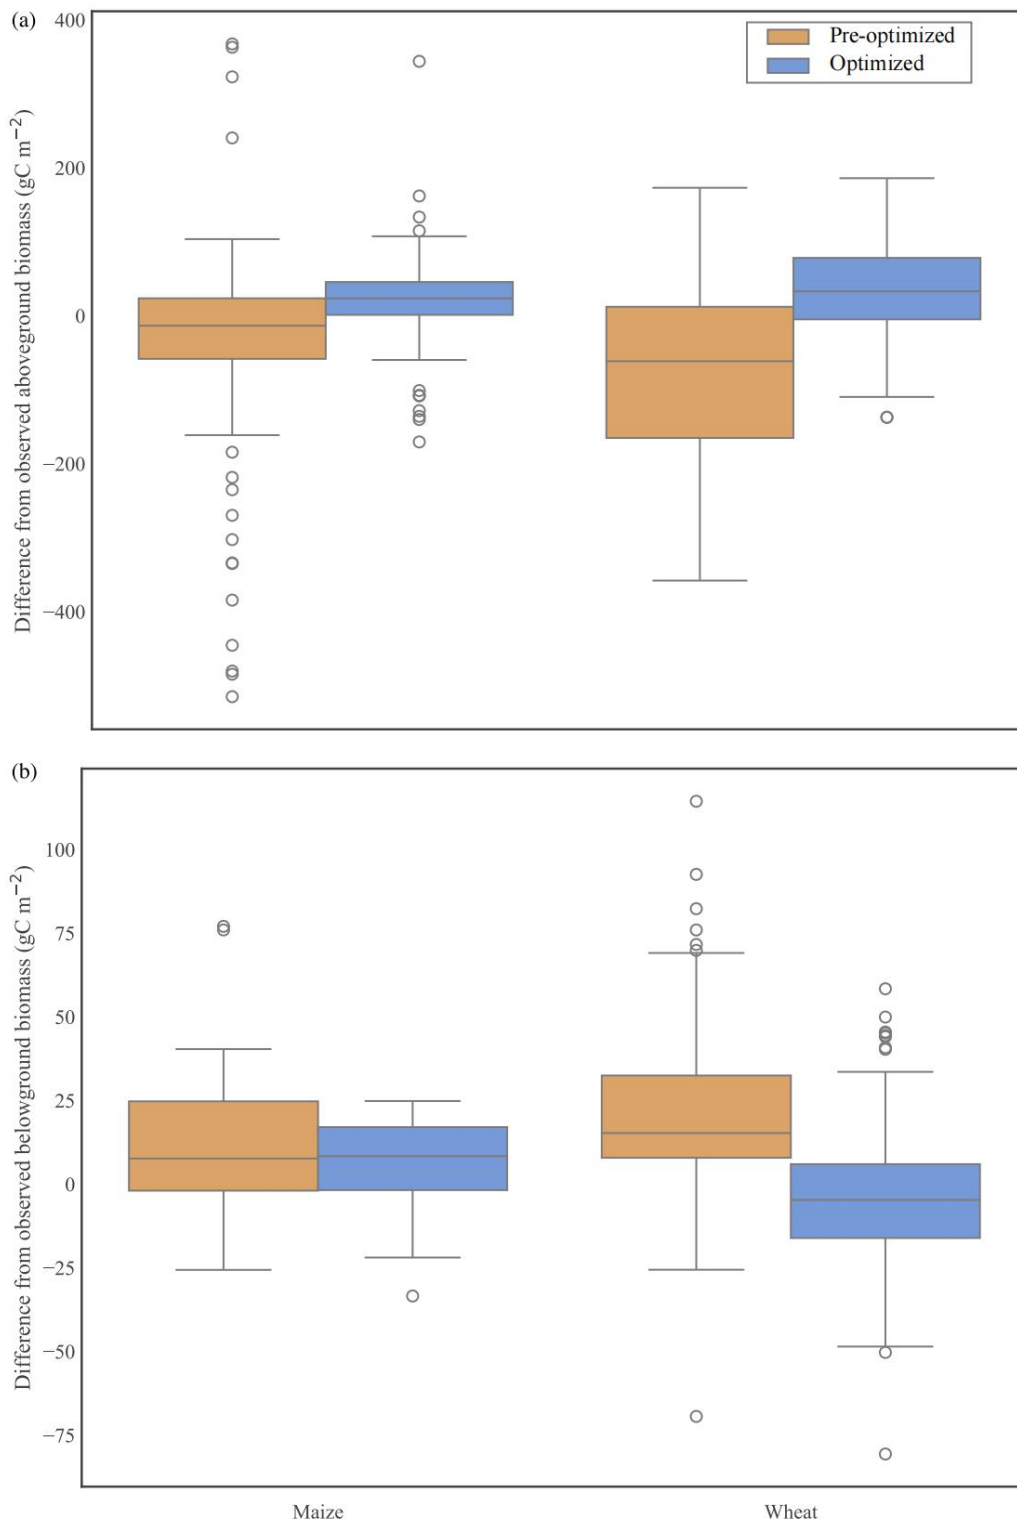

Fig. S2 Differences between simulated and observed values of aboveground biomass (AGB) and belowground biomass (BGB) for maize and wheat using the pre-optimized Agro-C model, and the optimized Agro-C model.

## References

- Allard, V., Martre, P., and Le Gouis, J.: Genetic variability in biomass allocation to roots in wheat is mainly related to crop tillering dynamics and nitrogen status, *European Journal of Agronomy*, 46, 68–76, <https://doi.org/10.1016/j.eja.2012.12.004>, 2013.
- Cai, Q., Zhang, Y., Sun, Z., Zheng, J., Bai, W., Zhang, Y., Liu, Y., Feng, L., Feng, C., Zhang, Z., Yang, N., Evers, J. B., and Zhang, L.: Morphological plasticity of root growth under mild water stress increases water use efficiency without reducing yield in maize, *Biogeosciences*, 14, 3851–3858, <https://doi.org/10.5194/bg-14-3851-2017>, 2017.
- Chen, R., Xiong, X., and Cheng, W.: Root characteristics of spring wheat under drip irrigation and their relationship with aboveground biomass and yield, *Sci Rep*, 11, 4913, <https://doi.org/10.1038/s41598-021-84208-7>, 2021.
- Duan, W.: Dynamic Response of Root-shoot Growth of Summer Maize to Soil Moisture under Deficit Irrigation, Northwest A&F University in Partial Fulfillment of the Requirements, 2022.
- Fang, Y., Du, Y., Wang, J., Wu, A., Qiao, S., Xu, B., Zhang, S., Siddique, K.H.M., Chen, Y.: Moderate Drought Stress Affected Root Growth and Grain Yield in Old, Modern and Newly Released Cultivars of Winter Wheat, *Front. Plant Sci.* 8, 672, <https://doi.org/10.3389/fpls.2017.00672>, 2017.
- Feng, G., Luo, Y.: Simulation on Functional Equilibrium of Winter Wheat Root and Shoot under Different Soil Water Regimes, *Acta Ecologica Sinica* 19, 1, 1999.
- Feng, H., Tan, X., Bi, Jian.: Study on the Root Distribution and Root Characteristics of Winter Wheat under Different Soil and Water Conditions, *Journal of Anhui Agri. Sci.* 2013, 41( 35) : 13465 - 13467,13471, 2013.
- Ge, T., Sui, F., Li, J., Lv, Y., Zhou, G.: Effects of Drought on Growth of Root and Shoot of Summer Maize, *Chinese Agricultural Science Bulletin* 21, 1, 2005.
- Ge, T., Sui, F., Bai, L., Tong, C., Sun, N.: Effects of water stress on growth, biomass partitioning, and water-use efficiency in summer maize (*Zea mays* L.) throughout the growth cycle, *Acta Physiol Plant* 34, 1043–1053. <https://doi.org/10.1007/s11738-011-0901-y>, 2012.
- Gheysari, M., Sadeghi, S.-H., Loescher, H. W., Amiri, S., Zareian, M. J., Majidi, M. M., Asgarinia, P., and Payero, J. O.: Comparison of deficit irrigation management strategies on root, plant growth and biomass productivity of silage maize, *Agricultural Water Management*, 182, 126–138, <https://doi.org/10.1016/j.agwat.2016.12.014>, 2017.
- Jiang, P.: Northeast Corn Material Production and Root Water Absorption Study on the Response of Water Stress, Shenyang Agricultural University, 2019.
- Liu, Z., Zhu, K., Dong, S., Liu, P., Zhao, B., and Zhang, J.: Effects of integrated agronomic practices management on root growth and development of summer maize, *European Journal of Agronomy*, 84, 140–151, <https://doi.org/10.1016/j.eja.2016.12.006>, 2017.
- Lu, H., Xia, Z., Fu, Y., Wang, Q., Xue, J., and Chu, J.: Response of Soil Temperature, Moisture, and Spring Maize (*Zea mays* L.) Root/Shoot Growth to Different Mulching Materials in Semi-Arid Areas of Northwest China, *Agronomy*, 10, 453, <https://doi.org/10.3390/agronomy10040453>, 2020.
- Núñez, A., Ball, R., and Schipanski, M.: Plant and soil microbial responses to irrigation retirement in semiarid cropping systems, *Environ. Res. Commun.*, 4, 035004, <https://doi.org/10.1088/2515-7620/ac59c3>, 2022.

- Pouri, K., Mardeh, A. S.-S., Sohrabi, Y., and Soltani, A.: Crop phenotyping for wheat yield and yield components against drought stress, *Cereal Research Communications*, 47, 383–393, <https://doi.org/10.1556/0806.47.2019.05>, 2019.
- Wang, C., Liu, W., Li, Q., Ma, D., Lu, H., Feng, W., Xie, Y., Zhu, Y., Guo, T.: Effects of different irrigation and nitrogen regimes on root growth and its correlation with above-ground plant parts in high-yielding wheat under field conditions, *Field Crops Research* 165, 138–149, <https://doi.org/10.1016/j.fcr.2014.04.011>, 2014.
- Wang, Y.: Study on the relationship among root system and shoot dry matter accumulation and yield from winter wheat under different cultivation and management modes, Henan Agricultural University, 2011
- Wang, Y.: Studies on Formation of Root Configuration and Its Relationships to Utilization of Water and Nitrogen Fertilizers and Grain Yield in Winter Wheat (*Triticum aestivum* L.) under Different Cultivation Management Patterns, Henan Agricultural University, 2014.
- Xu, H., Vandecasteele, B., Maenhout, P., Pannecoucq, J., De Neve, S., and Sleutel, S.: Maize root biomass and architecture depend on site but not on variety: Consequences for prediction of C inputs and spread in topsoil based on root-to-shoot ratios, *European Journal of Agronomy*, 119, 126121, <https://doi.org/10.1016/j.eja.2020.126121>, 2020.
- Zhao, J., Xue, Q., Jessup, K. E., Hou, X., Hao, B., Marek, T. H., Xu, W., Evett, S. R., O’Shaughnessy, S. A., and Brauer, D. K.: Shoot and root traits in drought tolerant maize (*Zea mays* L.) hybrids, *Journal of Integrative Agriculture*, 17, 1093–1105, [https://doi.org/10.1016/S2095-3119\(17\)61869-0](https://doi.org/10.1016/S2095-3119(17)61869-0), 2018.
- Zhang, X.: Effects of Different Water-Nitrogen Treatments on Root Growth and the Accumulation and Translocation of Aboveground Dry Matter together with Yield in Wheat, Henan Agricultural University, 2023.
